# Supplementary material
Source: PubMed Central journal article supplement (PMC6048588)
Supplement: NIHMS980482-supplement-Supp_Figs.pdf [file NIHMS980482-supplement-Supp_Figs.pdf]

A

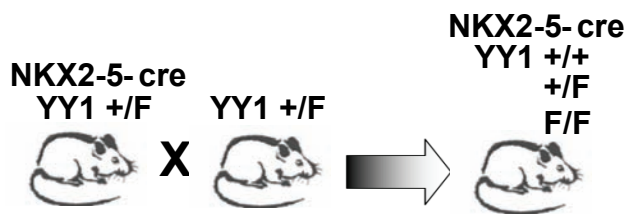

B

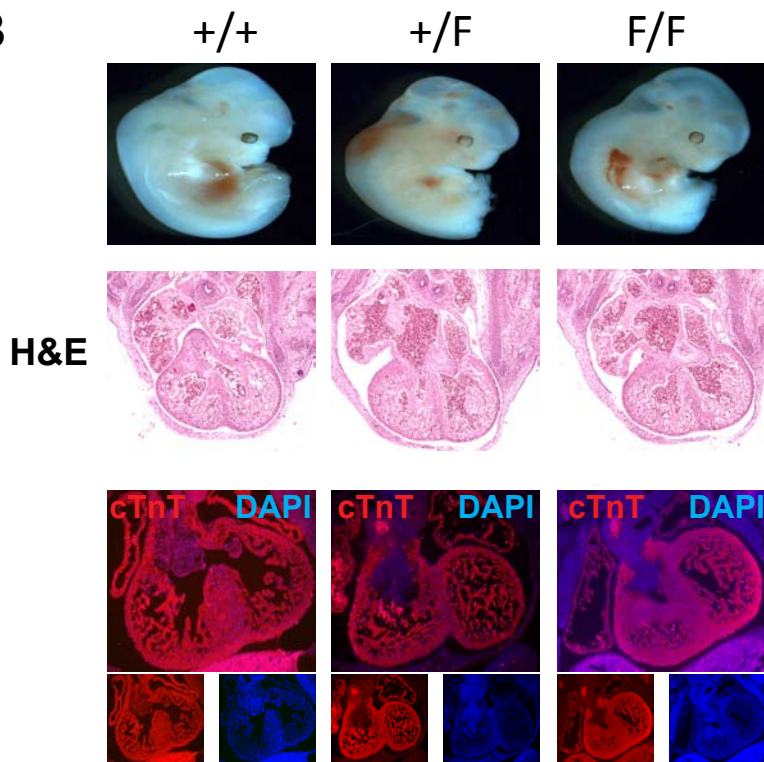

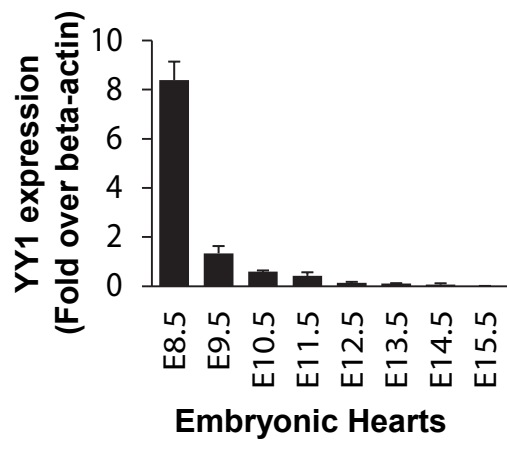

A

## NKX2-5 enhancer/promoter

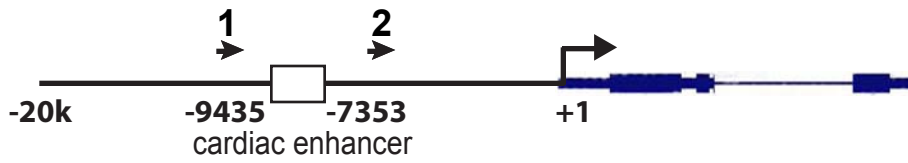

B

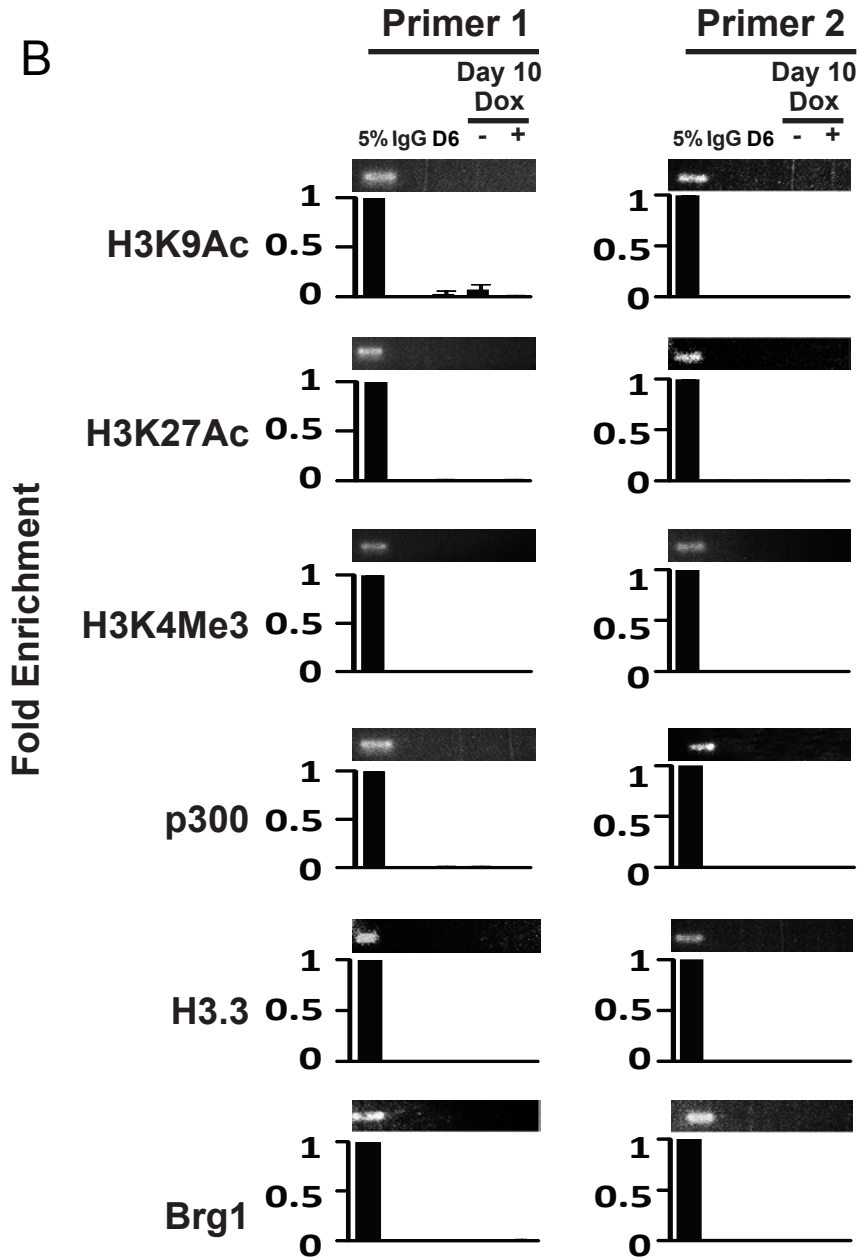

A

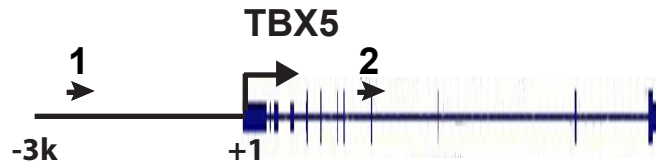

B

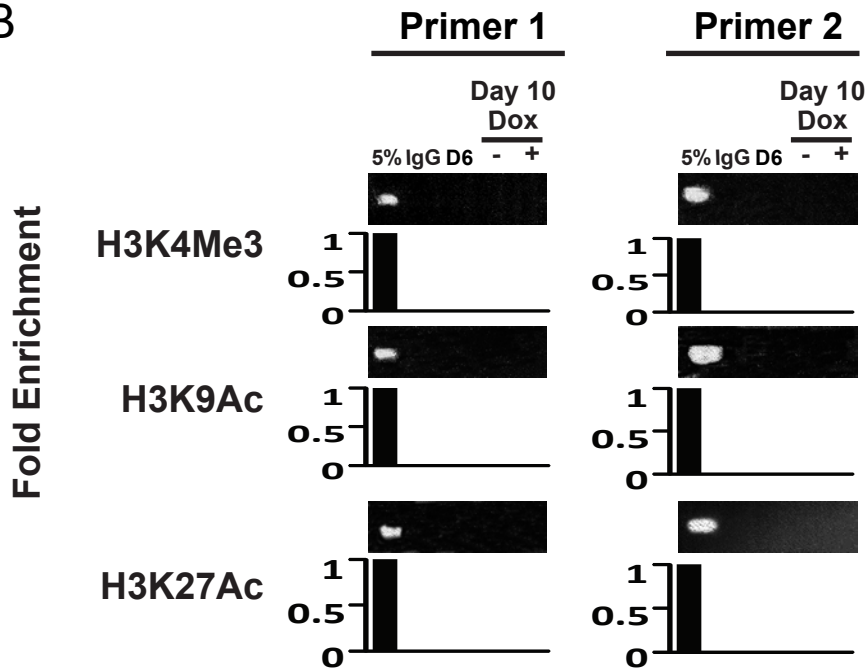

C

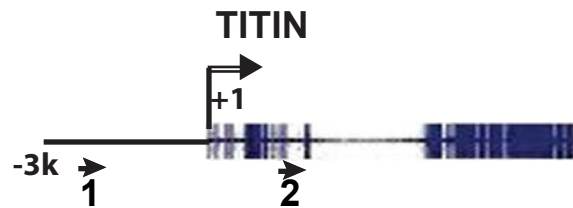

D

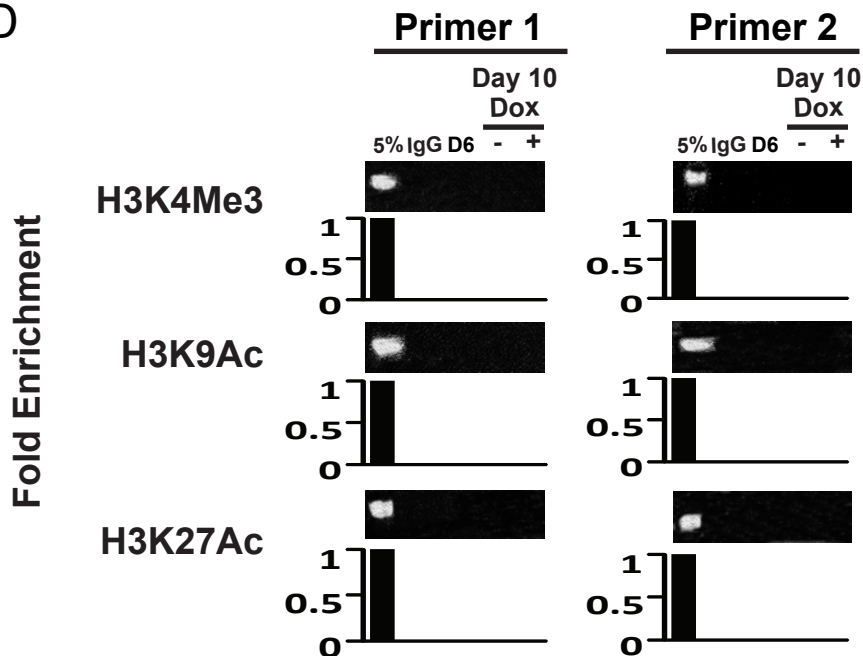

**Supplement Table I.** Results from the interbreeding of Nkx2-5-Cre;YY1 Flox/+ male with YY1 Flox/+ females.

| <b>e10.5</b> | YY1 genotype |                  |               |                |
|--------------|--------------|------------------|---------------|----------------|
|              | NKX2-5-cre   | +/+              | +/F           | F/F            |
| +            |              | 11/7 (18.6/12.5) | 10/15 (17/25) | 4/7 (6.8/12.5) |
| -            |              | 12/7 (20.3/12.5) | 15/15 (25/25) | 4/7 (6.8/12.5) |

| <b>e11.5</b> | YY1 genotype |                 |               |                 |
|--------------|--------------|-----------------|---------------|-----------------|
|              | NKX2-5-cre   | +/+             | +/F           | F/F             |
| +            |              | 6/4 (17.6/12.5) | 8/9 (23.5/25) | 5/4 (14.7/12.5) |
| -            |              | 4/4 (11.8/12.5) | 7/9 (20.6/25) | 4/4 (12.5/12.5) |

| <b>e12.5</b> | YY1 genotype |                 |               |                 |
|--------------|--------------|-----------------|---------------|-----------------|
|              | NKX2-5-cre   | +/+             | +/F           | F/F             |
| +            |              | 4/3 (14.7/12.5) | 5/7 (18.5/25) | 6/3 (22.5/12.5) |
| -            |              | 5/3 (8.5/12.5)  | 4/7 (14.8/25) | 3/3 (12.5/12.5) |

The data shown represents actual/expected number of embryos at embryonic days 10.5 (e10.5), 11.5 (e11.5), and 12.5 (e12.5) for each genotype. The actual/expected percentages of each genotype are displayed in parentheses next to the corresponding embryo number. + = wild type allele. F =Floxed allele.
